# Supplementary material
Source: publisher figshare collection journal article supplement (https://acs.figshare.com/ndownloader/files/4628281)

## Supporting Information

### Chiral Spherical Molecule Constructed from Aromatic Amides: Facile Synthesis and Highly Ordered Network Structure in the Crystal

Hyuma Masu, Kosuke Katagiri, Takako Kato, Hiroyuki Kagechika, Masahide Tominaga,  
and Isao Azumaya\*

*Faculty of Pharmaceutical Sciences at Kagawa Campus, Tokushima Bunri University, 1314-1  
Shido, Sanuki, Kagawa 769-2193, Japan, School of Biomedical Science, Tokyo Medical and  
Dental University, Kanda-Surugadai, Chiyoda-ku, Tokyo 101-0062, Japan*

*azumayai@kph.bunri-u.ac.jp*

### Table of Contents

|                                                                |     |
|----------------------------------------------------------------|-----|
| Details of chiral separation -----                             | S 2 |
| X-ray crystallographic analysis and ORTEP diagrams -----       | S 3 |
| Details of intermolecular CH/O and CH/ $\pi$ interactions----- | S 4 |
| $^1\text{H}$ NMR spectra of compounds -----                    | S 5 |
| $^{13}\text{C}$ NMR spectra of compounds-----                  | S 9 |
| Mass Spectra of compounds -----                                | S12 |

### Details of chiral separation

The chiral separation of **1** was carried out by chiral HPLC. HPLC was performed on a Waters delta-600 systems with column, SUMICHIRAL OA-4800. Other details are described on Figure S1.

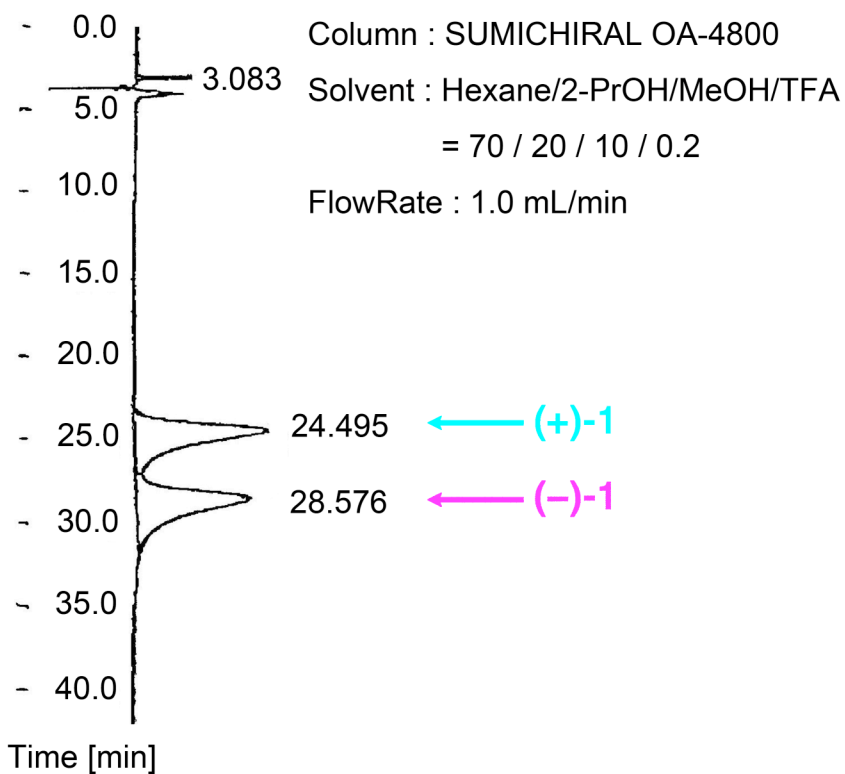

**Figure S1.** Chart of chiral HPLC for chiral separation of compound **1**.

## X-ray crystallographic analysis and ORTEP diagrams

**General.** The X-ray crystallographic analyses were under taken using CCD diffractometer with graphite monochromated MoK $\alpha$  ( $\lambda = 0.71073$  Å). The crystal structures were solved by using SHELXS 97 (Sheldrick, 1997). Refinements were carried out by full-matrix least squares (on  $F^2$ ) with anisotropic temperature factors for non-H atoms. In all of the structures H atoms were included as their calculated positions. For refinement of the structure and structure analysis, the program package SHELXTL was used.

**Crystal of racemic 1.** Three oxygen atoms of water molecules (O7, O8 and O9) have 0.5 of occupancy respectively (Figure S2). The positions of hydrogen atoms included in the water molecules were not calculated. The Friedel pairs were averaged in refinement.

**Crystal of enantio-pure (+)-1:** Two spherical molecules and three water molecules (O13, O14 and O15) exist independently in an asymmetric unit (Figure S3). The positions of hydrogen atoms included in the water molecules were not calculated. The Flack parameter for estimation of the absolute structure is indeterminate. The Friedel pairs were averaged in refinement.

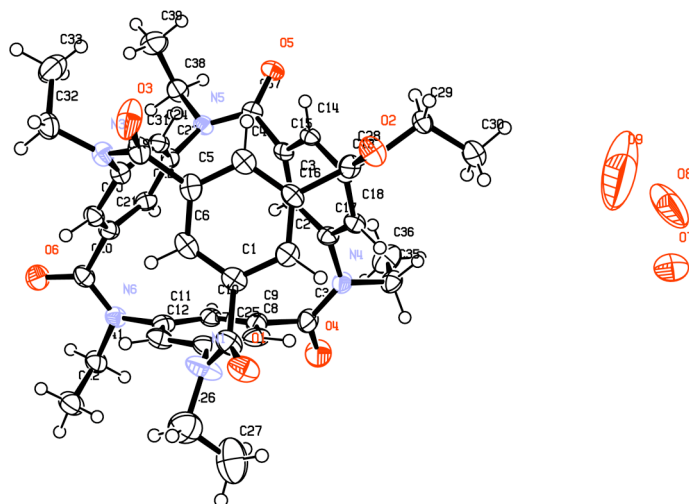

### Details of intermolecular CH/O and CH/ $\pi$ interactions

In the crystal of racemic **1**, eight molecules are joined to one molecule by multiple CH/O interactions (Figure S4). In contrast, six molecules are joined to one molecule by multiple CH/O and CH/ $\pi$  interactions in the crystal of enatio-pure (+)-**1** (Figure S5).

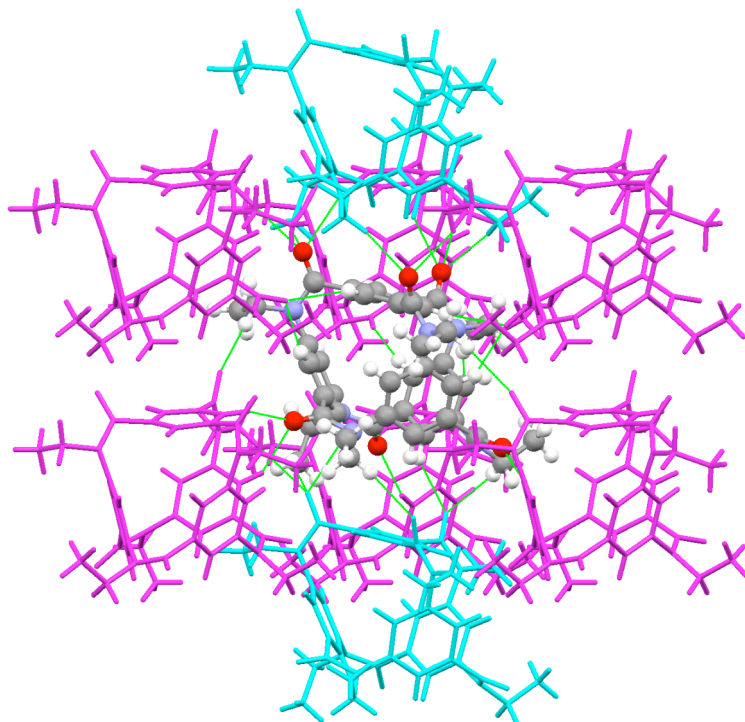

**Figure S4.** Intermolecular interactions around one molecule in the crystal of racemic **1**. Green lines show CH/O interactions. Magenta- and cyan-colored molecules are enantiomers of each other.

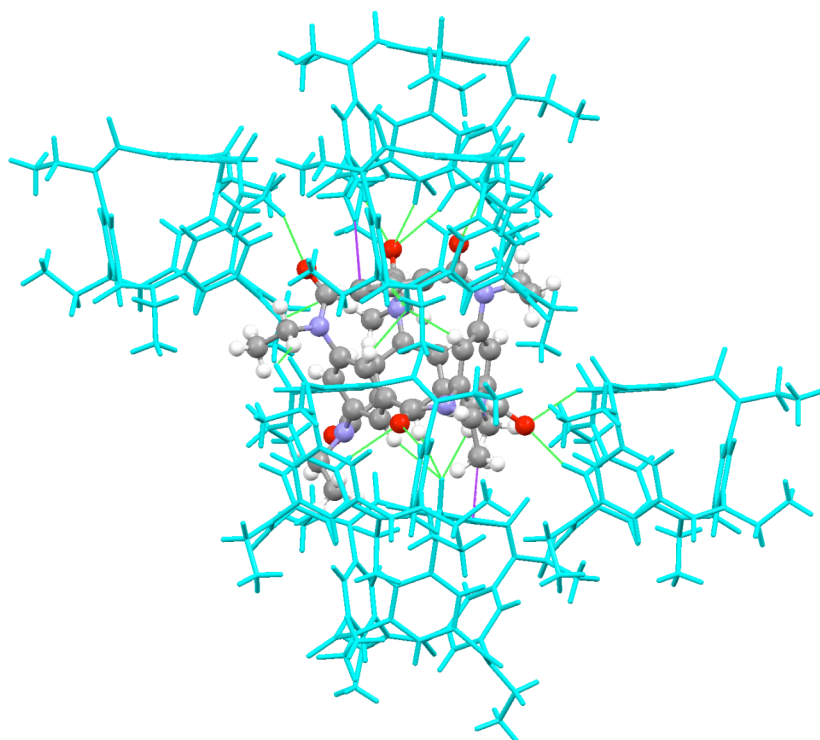

**Figure S5.** Intermolecular interactions around one molecule in the crystal of enantio-pure (+)-**1**. Green lines and purple lines show CH/O and CH/ $\pi$  interactions respectively.

# <sup>1</sup>H NMR Spectra of Compounds

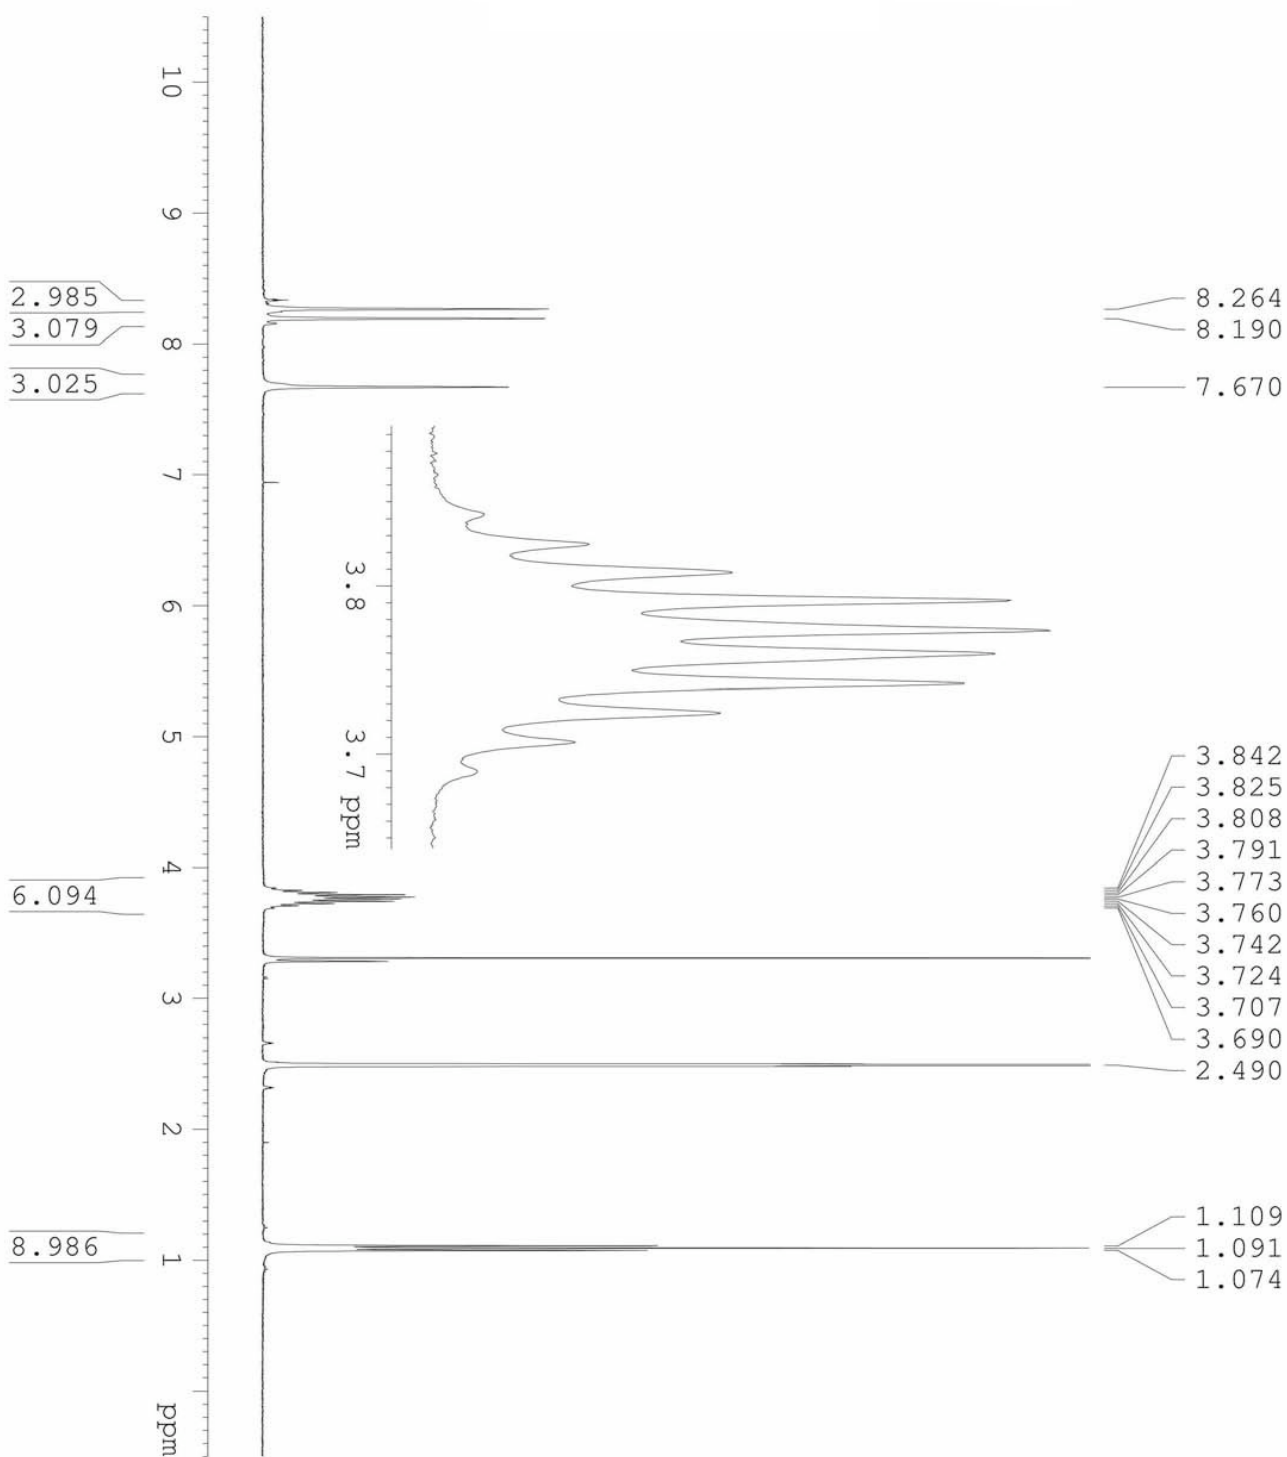

Current Data Parameters  
NAME 070604  
EXPNO 2  
PROCNO 1

F2 - Acquisition Parameters  
Date\_ 20070604  
Time 14.40

INSTRUM 5 mm Multinuc1  
PROBHD zg30  
PULPROG 65536  
TD 16  
SOLVENT DMSO  
NS 2  
DS 2

SWH 8278.146 Hz  
FIDRES 0.126314 Hz  
AQ 3.9584243 sec  
RG 812.7

DW 60.400 usec  
DE 6.50 usec  
TE 298.0 K  
D1 1.0000000 sec  
TD0 1

S5

===== CHANNEL f1 =====  
NUC1 1H  
P1 15.00 usec  
PL1 0.50 dB  
SFO1 400.1324710 MHz  
F2 - Processing parameters  
SI 32768  
SF 400.1300059 MHz  
WDW EM  
SSB 0  
LB 0.30 Hz  
GB 0  
PC 1.00

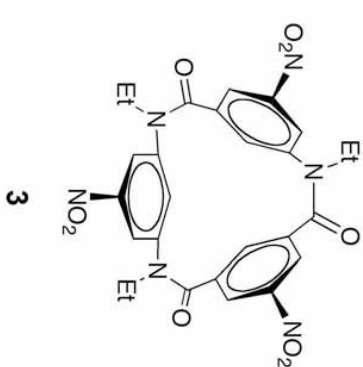

trimer\_NHEt\_120d

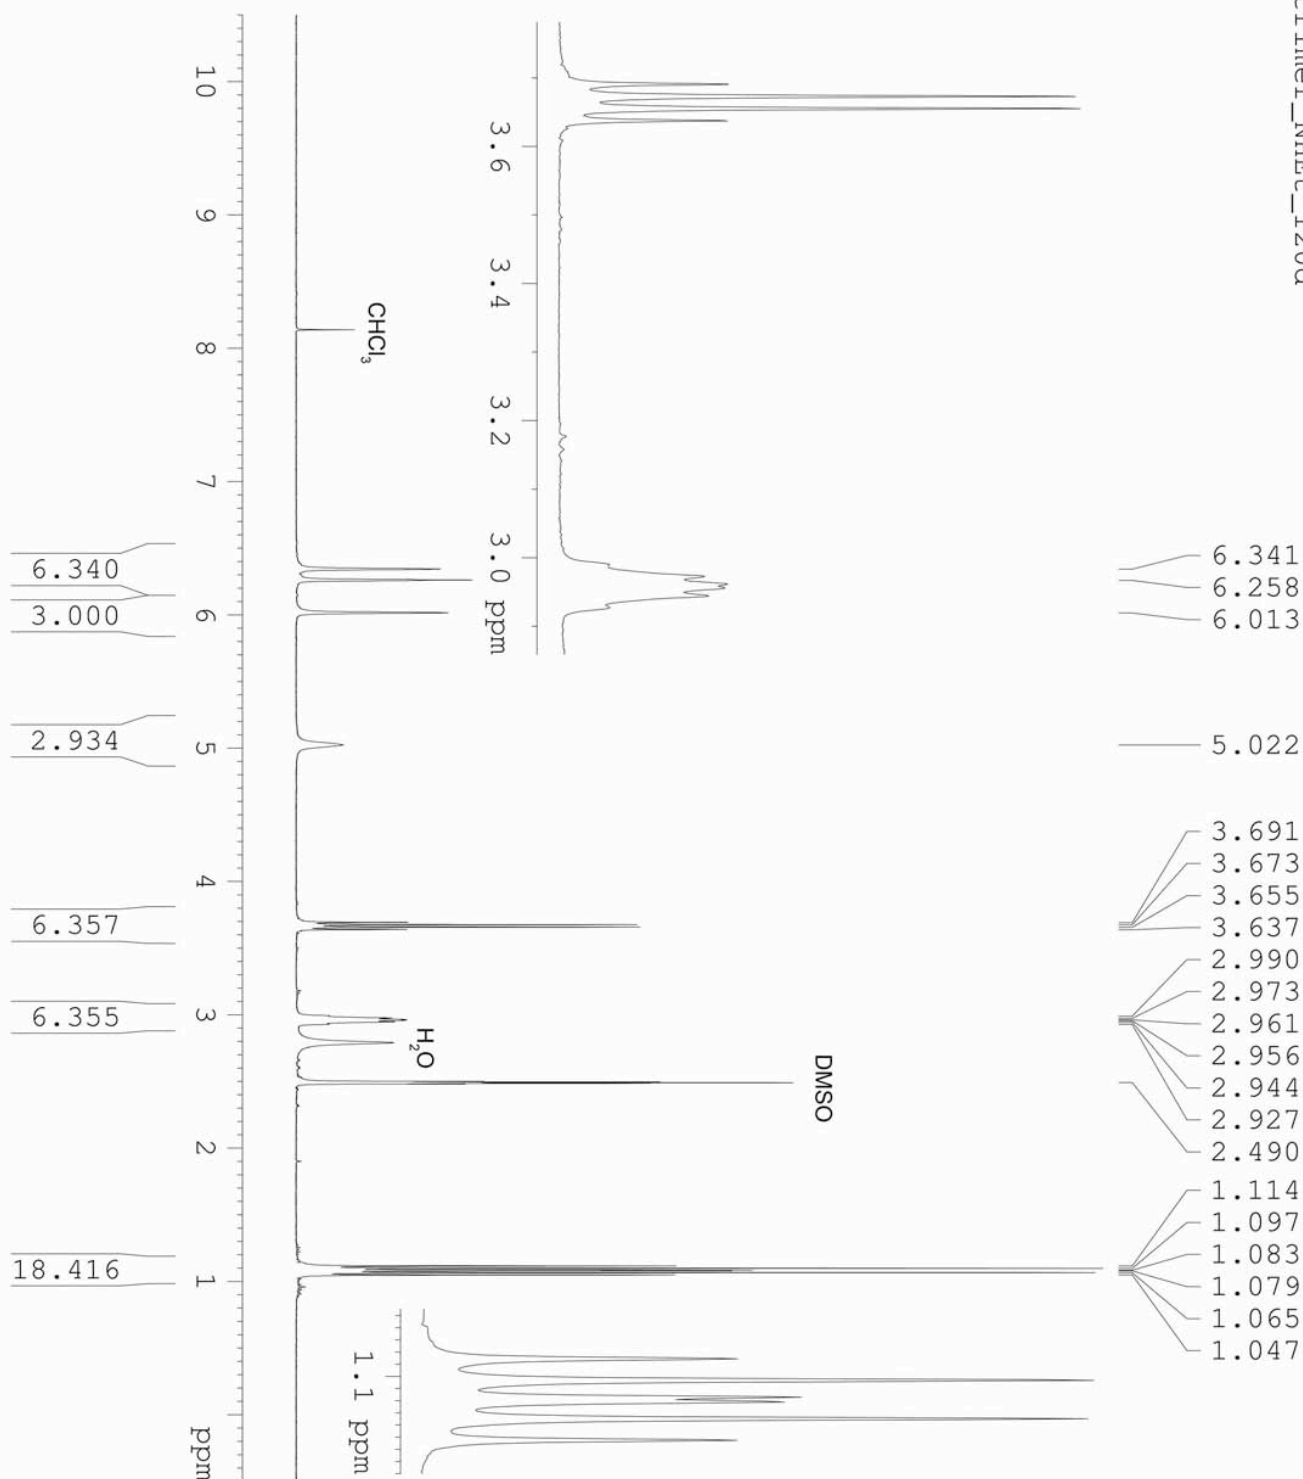

Current Data Parameters  
NAME a071226mass2  
EXPNO 4  
PROCNO 1

F2 - Acquisition Parameters  
Date\_ 20071226  
Time 20.16

INSTRUM 5 mm Multinuc1  
PROBHD zg30  
PULPROG zg30  
TD 65536  
SOLVENT DMSO  
NS 16  
DS 2  
SWH 8278.146 Hz  
FIDRES 0.126314 Hz  
AQ 3.9584243 sec  
RG 574.7  
DW 60.400 usec  
DE 6.50 usec  
TE 393.3 K  
D1 1.00000000 sec  
TD0 1

===== CHANNEL f1 =====  
NUC1 1H  
P1 15.00 usec  
PL1 0.50 dB  
SFO1 400.1324710 MHz

F2 - Processing parameters  
SI 32768  
SF 400.1300060 MHz  
WDW EM  
SSB 0  
LB 0.30 Hz  
GB 0  
PC 1.00

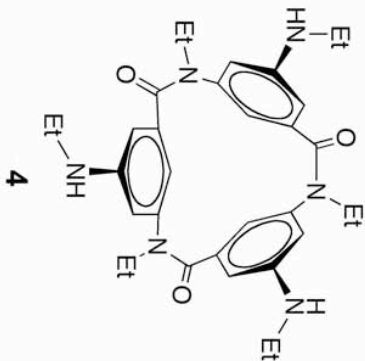

VT-NMR for compound **4** in DMSO.

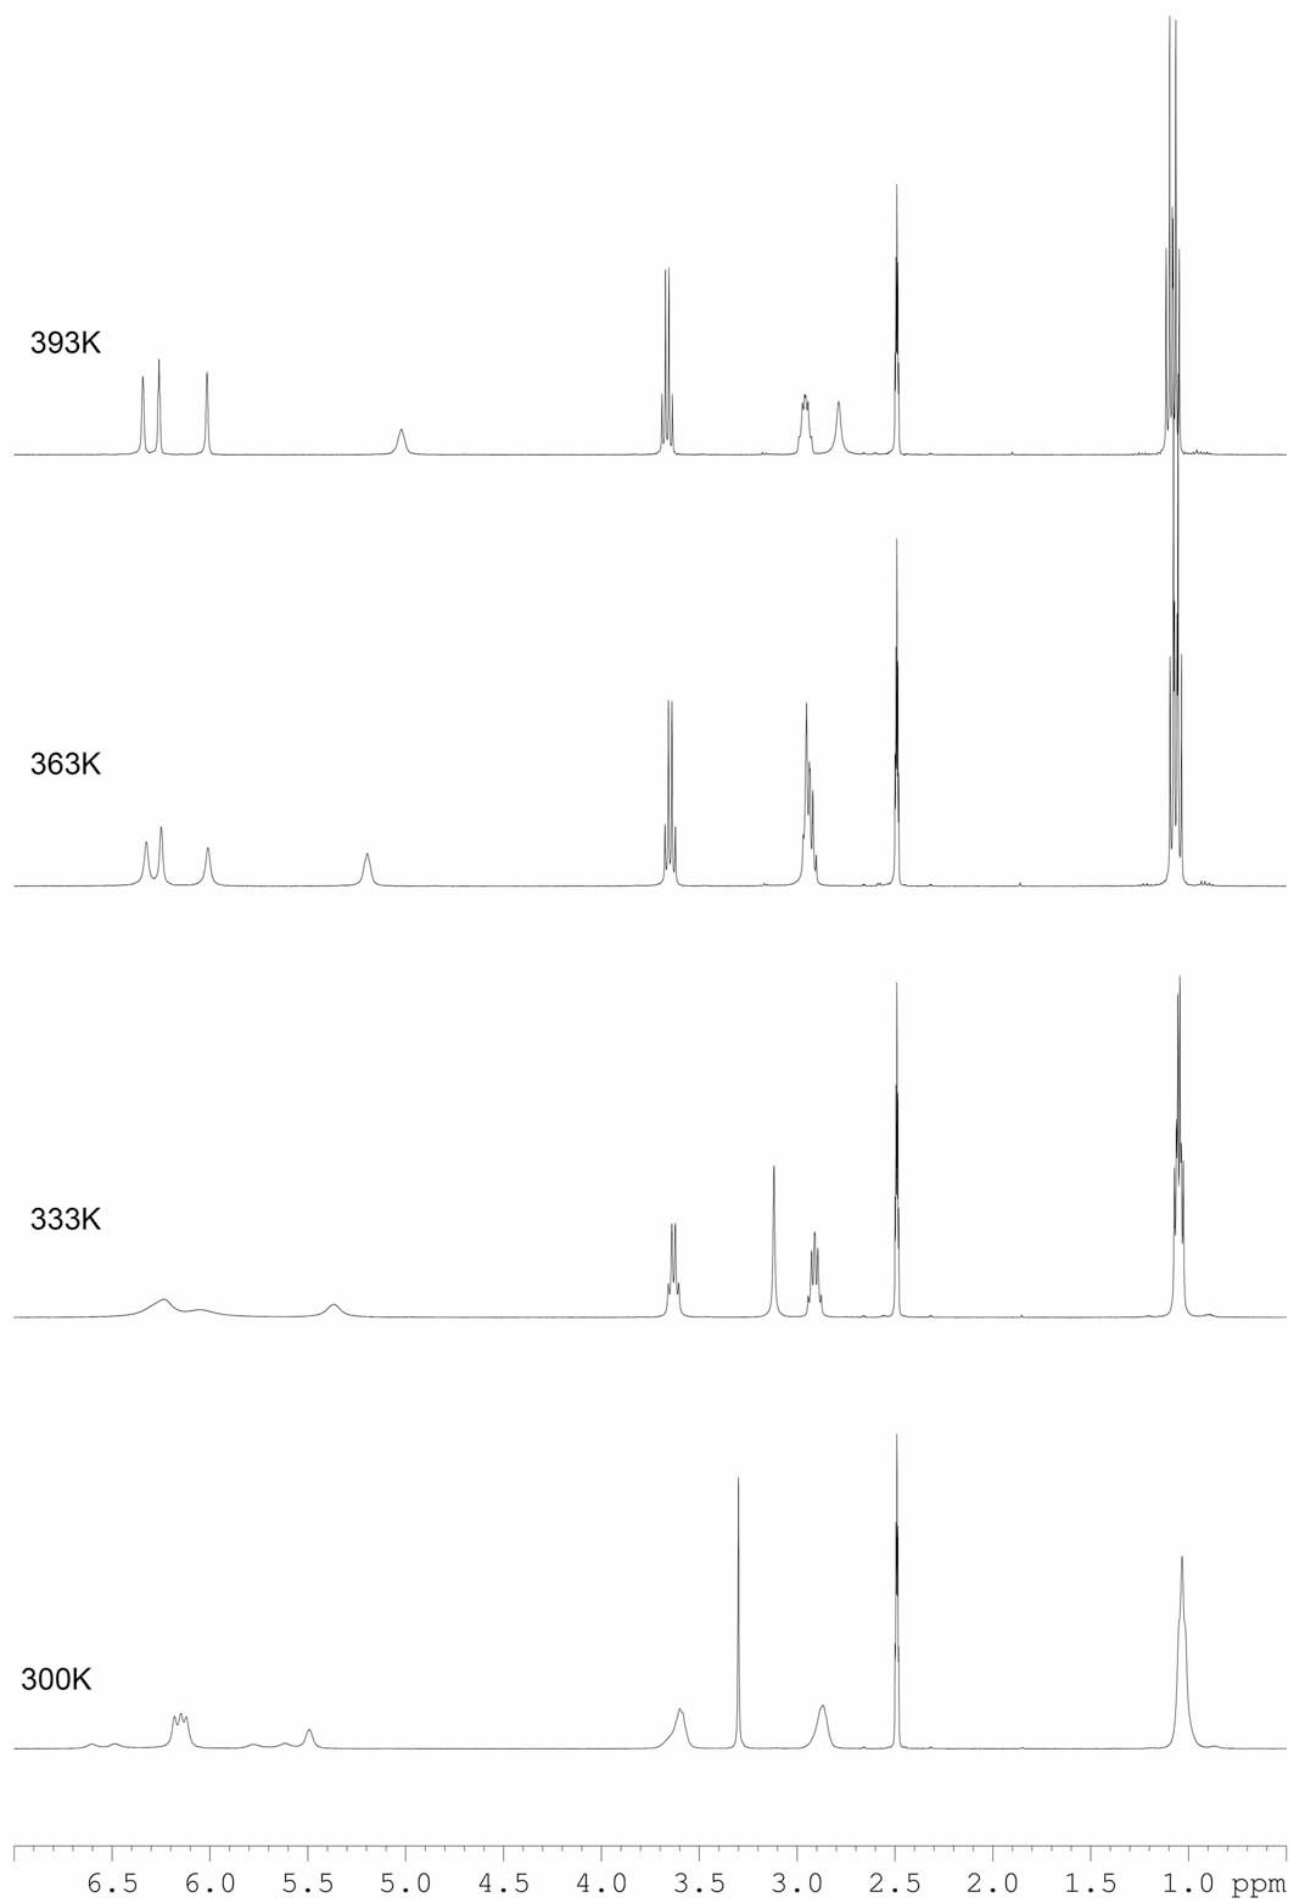

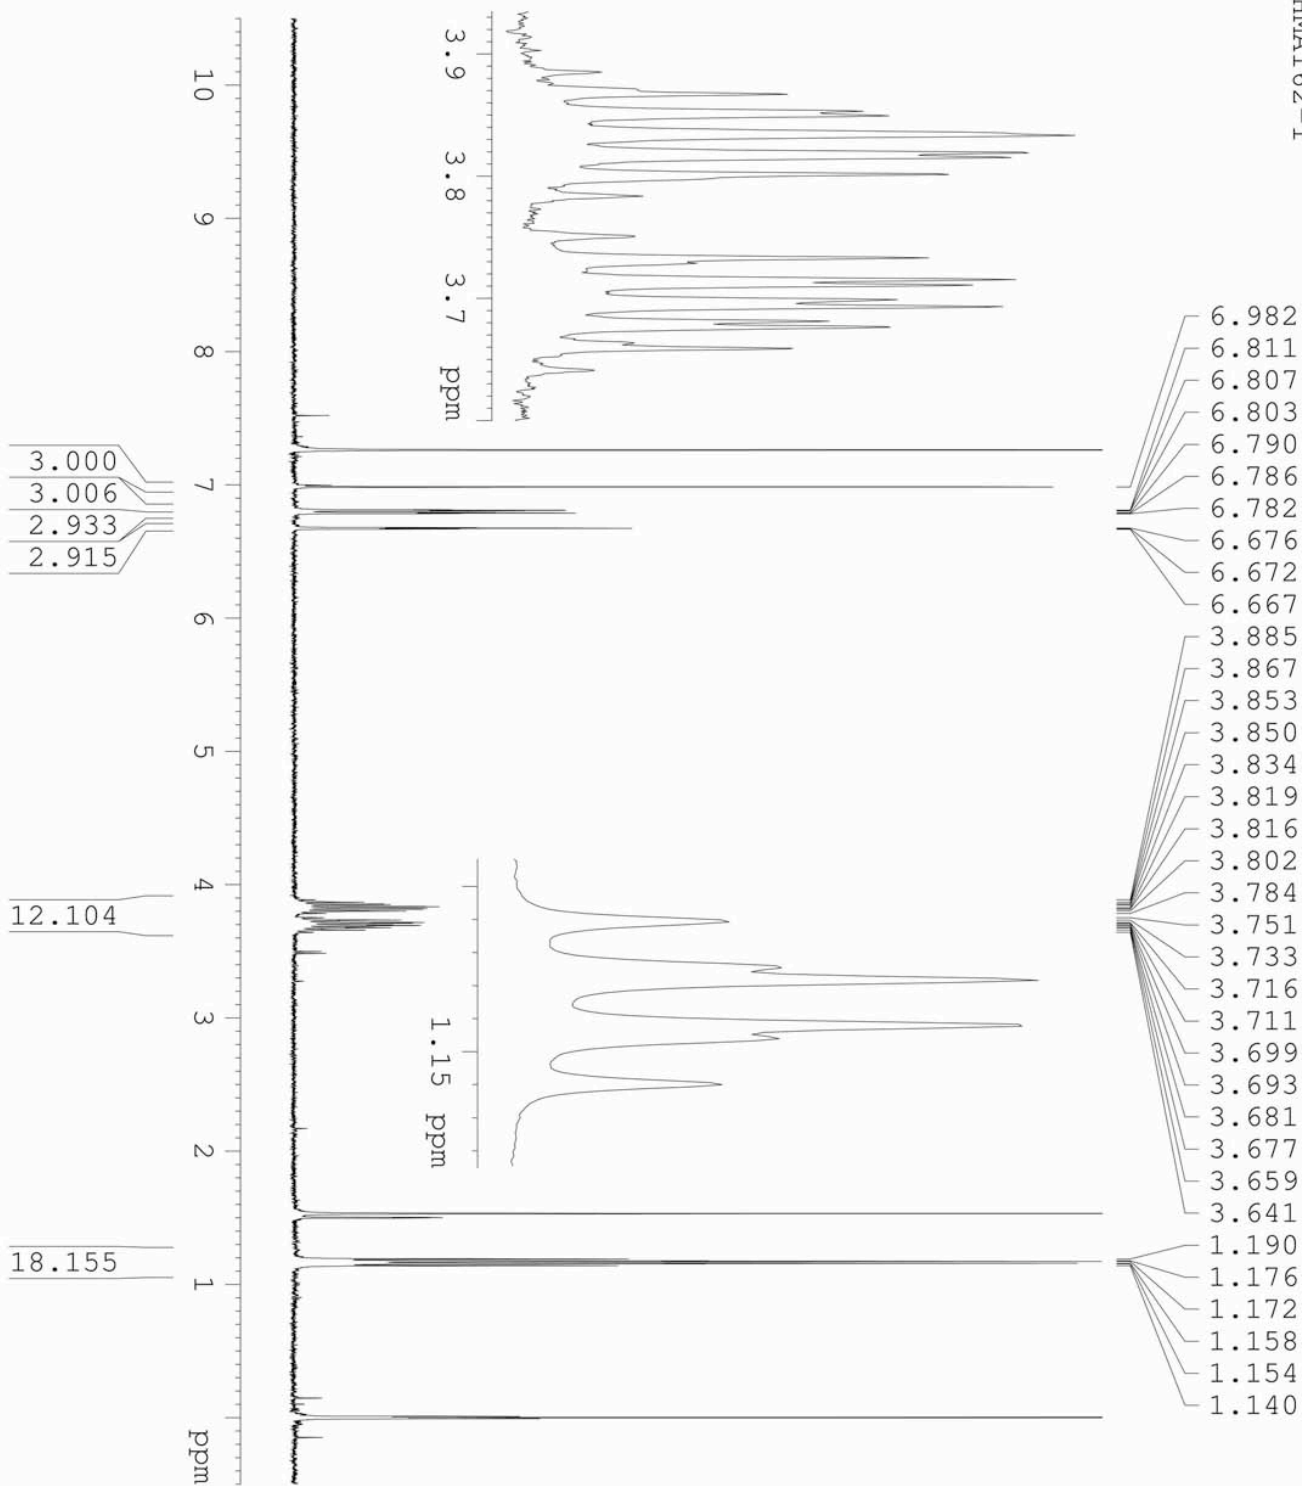

Current Data Parameters  
NAME 060227mas1  
EXPNO 1  
PROCNO 1

F2 - Acquisition Parameters  
Date\_ 20060227  
Time 16.18  
INSTRUM av400  
PROBHD 5 mm Multinucl  
PULPROG zg30  
TD 65536  
SOLVENT CDCl3  
NS 16  
DS 2  
SWH 8278.146 Hz  
FIDRES 0.126314 Hz  
AQ 3.9584243 sec  
RG 1024  
DW 60.400 usec  
DE 6.50 usec  
TE 300.0 K  
D1 1.00000000 sec  
TD0 1

===== CHANNEL f1 =====  
NUC1 1H  
P1 15.00 usec  
PL1 0.50 dB  
SFO1 400.1324710 MHz

F2 - Processing parameters  
SI 32768  
SF 400.130096 MHz  
WDW EM  
SSB 0  
LB 0.30 Hz  
GB 0  
PC 1.00

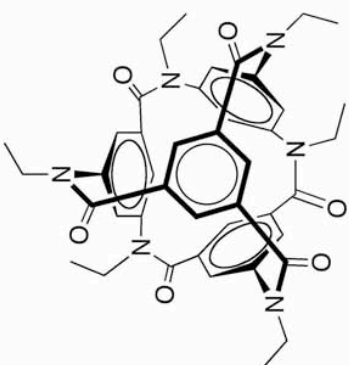

**1** (racemic)



# <sup>13</sup>C NMR Spectra of Compound

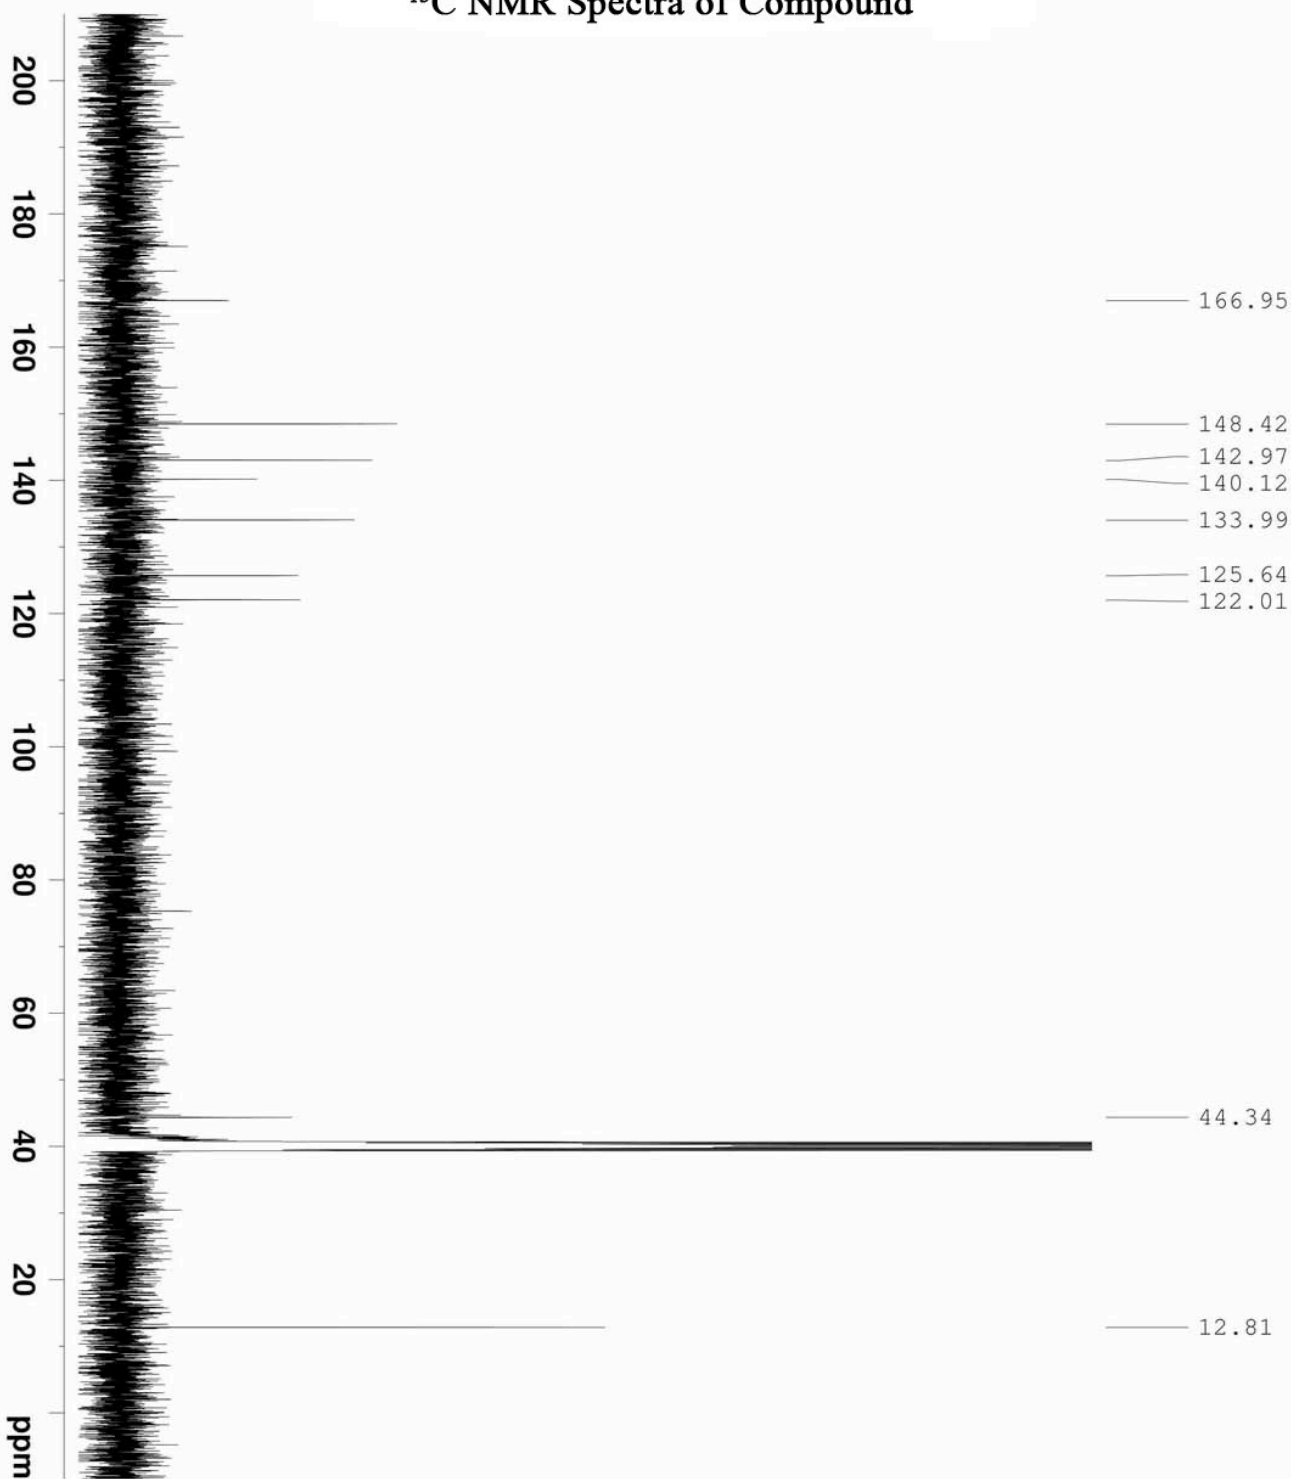

Current Data Parameters  
NAME 070604  
EXPNO 3  
PROCNO 1

## F2 - Acquisition Parameters

Date\_ 20070604  
Time 16.15  
INSTRUM av400  
PROBHD 5 mm Multinucl  
PULPROG zgpg30  
TD 65536  
SOLVENT DMSO  
NS 1500  
DS 2  
SWH 23980.814 Hz  
FIDRES 0.365918 Hz  
AQ 1.3664756 sec  
RG 32768  
DM 20.850 usec  
DE 20.00 usec  
TE 298.2 K  
D1 2.00000000 sec  
d11 0.03000000 sec  
DELTA 1.89999998 sec  
TD0 1

===== CHANNEL f1 =====  
NUC1 13C  
P1 9.50 usec  
PL1 -2.00 dB  
SFO1 100.6228298 MHz

===== CHANNEL f2 =====  
CPDPRG2 waltz16  
NUC2 1H  
PCPD2 80.00 usec  
PL12 15.00 dB  
PL13 15.00 dB  
PL2 0.00 dB  
SFO2 400.1316005 MHz

F2 - Processing parameters  
SI 32768  
SF 100.6127690 MHz  
WDW EM  
SSB 0  
LB 1.00 Hz  
GB 0  
PC 1.40

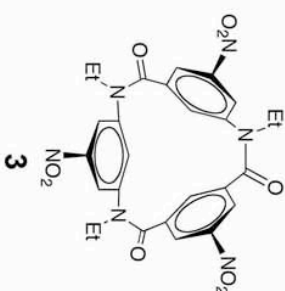

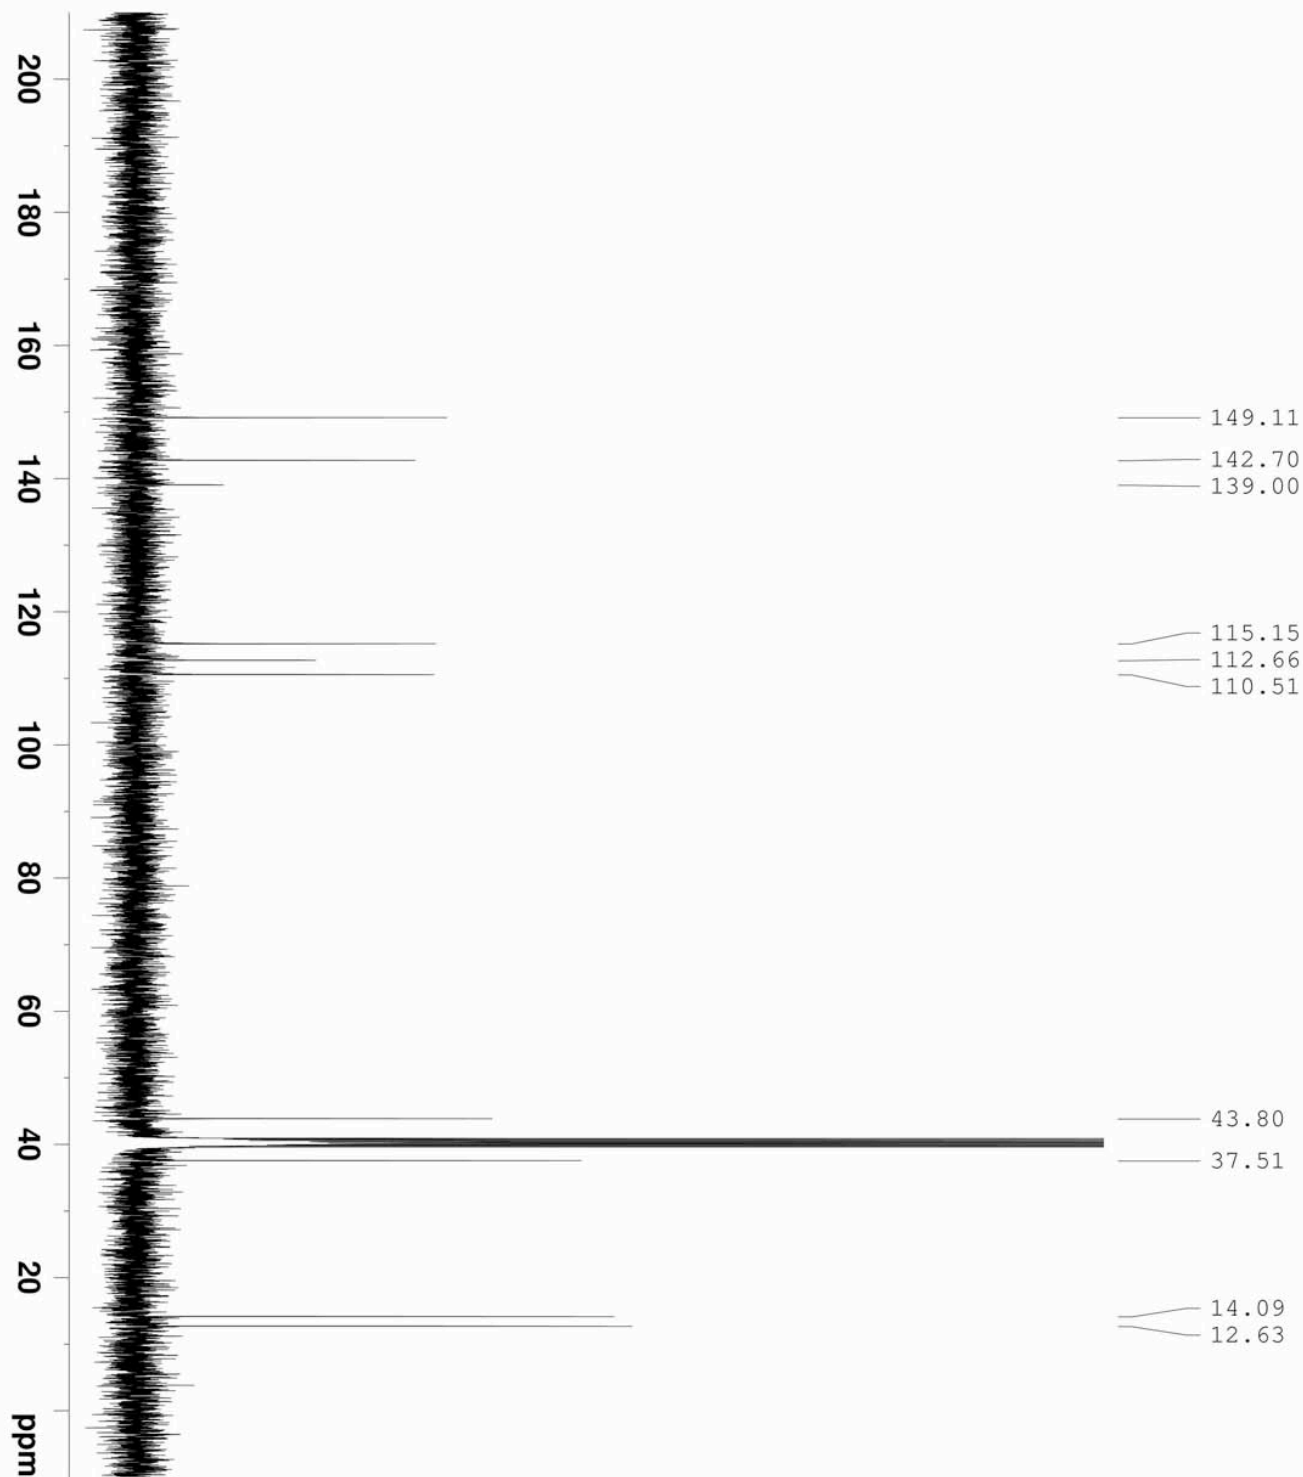

Current Data Parameters  
 NAME a071226mas2  
 EXPNO 5  
 PROCNO 1

F2 - Acquisition Parameters  
 Date\_ 20071226  
 Time 22.18

INSTRUM av400  
 PROBHD 5 mm Multinucl  
 PULPROG zgpg30  
 TD 65536  
 SOLVENT DMSO  
 NS 2048  
 DS 2

SWH 23980.814 Hz  
 FIDRES 0.365918 Hz  
 AQ 1.3664756 sec

RG 32768  
 DW 20.850 usec  
 DE 20.00 usec  
 TE 392.8 K

D1 2.00000000 sec  
 d11 0.03000000 sec  
 DELTA 1.89999998 sec  
 TD0 1

===== CHANNEL f1 =====  
 NUC1 13C  
 P1 9.50 usec  
 PL1 -2.00 dB  
 SFO1 100.6228298 MHz

===== CHANNEL f2 =====  
 CPDPRG2 waltz16  
 NUC2 1H  
 PCPD2 80.00 usec  
 PL12 15.00 dB  
 PL13 15.00 dB  
 PL2 0.00 dB  
 SFO2 400.1316005 MHz

F2 - Processing parameters  
 SI 32768  
 SF 100.6128193 MHz  
 WDW EM  
 SSB 0  
 LB 1.00 Hz  
 GB 0  
 PC 1.40

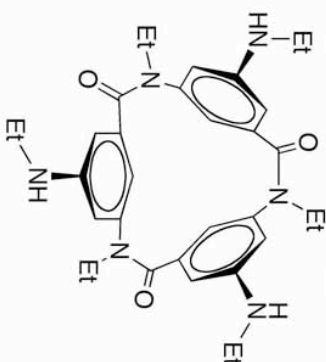

Current Data Parameters  
 NAME 060228mas1  
 EXPNO 1  
 PROCNO 1

F2 - Acquisition Parameters

Date\_ 20060228  
 Time 12.45  
 INSTRUM av400  
 PROBD 5 mm Multinucl  
 PULPROG zgpg30  
 TD 65536  
 SOLVENT CDCl3  
 NS 2048  
 DS 2  
 SWH 23980.814 Hz  
 FIDRES 0.365918 Hz  
 AQ 1.3664756 sec  
 RG 32768  
 DW 20.850 usec  
 DE 20.00 usec  
 TE 300.0 K  
 D1 2.00000000 sec  
 d11 0.03000000 sec  
 DELTA 1.89399998 sec  
 TD0 1

===== CHANNEL f1 =====  
 NUC1 <sup>13</sup>C  
 P1 9.50 usec  
 PL1 -2.00 dB  
 SFO1 100.6228298 MHz

===== CHANNEL f2 =====  
 CPDPRG2 waltz16  
 NUC2 <sup>1</sup>H  
 PCPD2 80.00 usec  
 PL2 0.00 dB  
 PL12 15.00 dB  
 PL13 15.00 dB  
 SFO2 400.1316005 MHz

F2 - Processing parameters  
 SI 32768  
 SF 100.6127677 MHz  
 WDW EM  
 SSB 0  
 LB 1.00 Hz  
 GB 0  
 PC 1.40

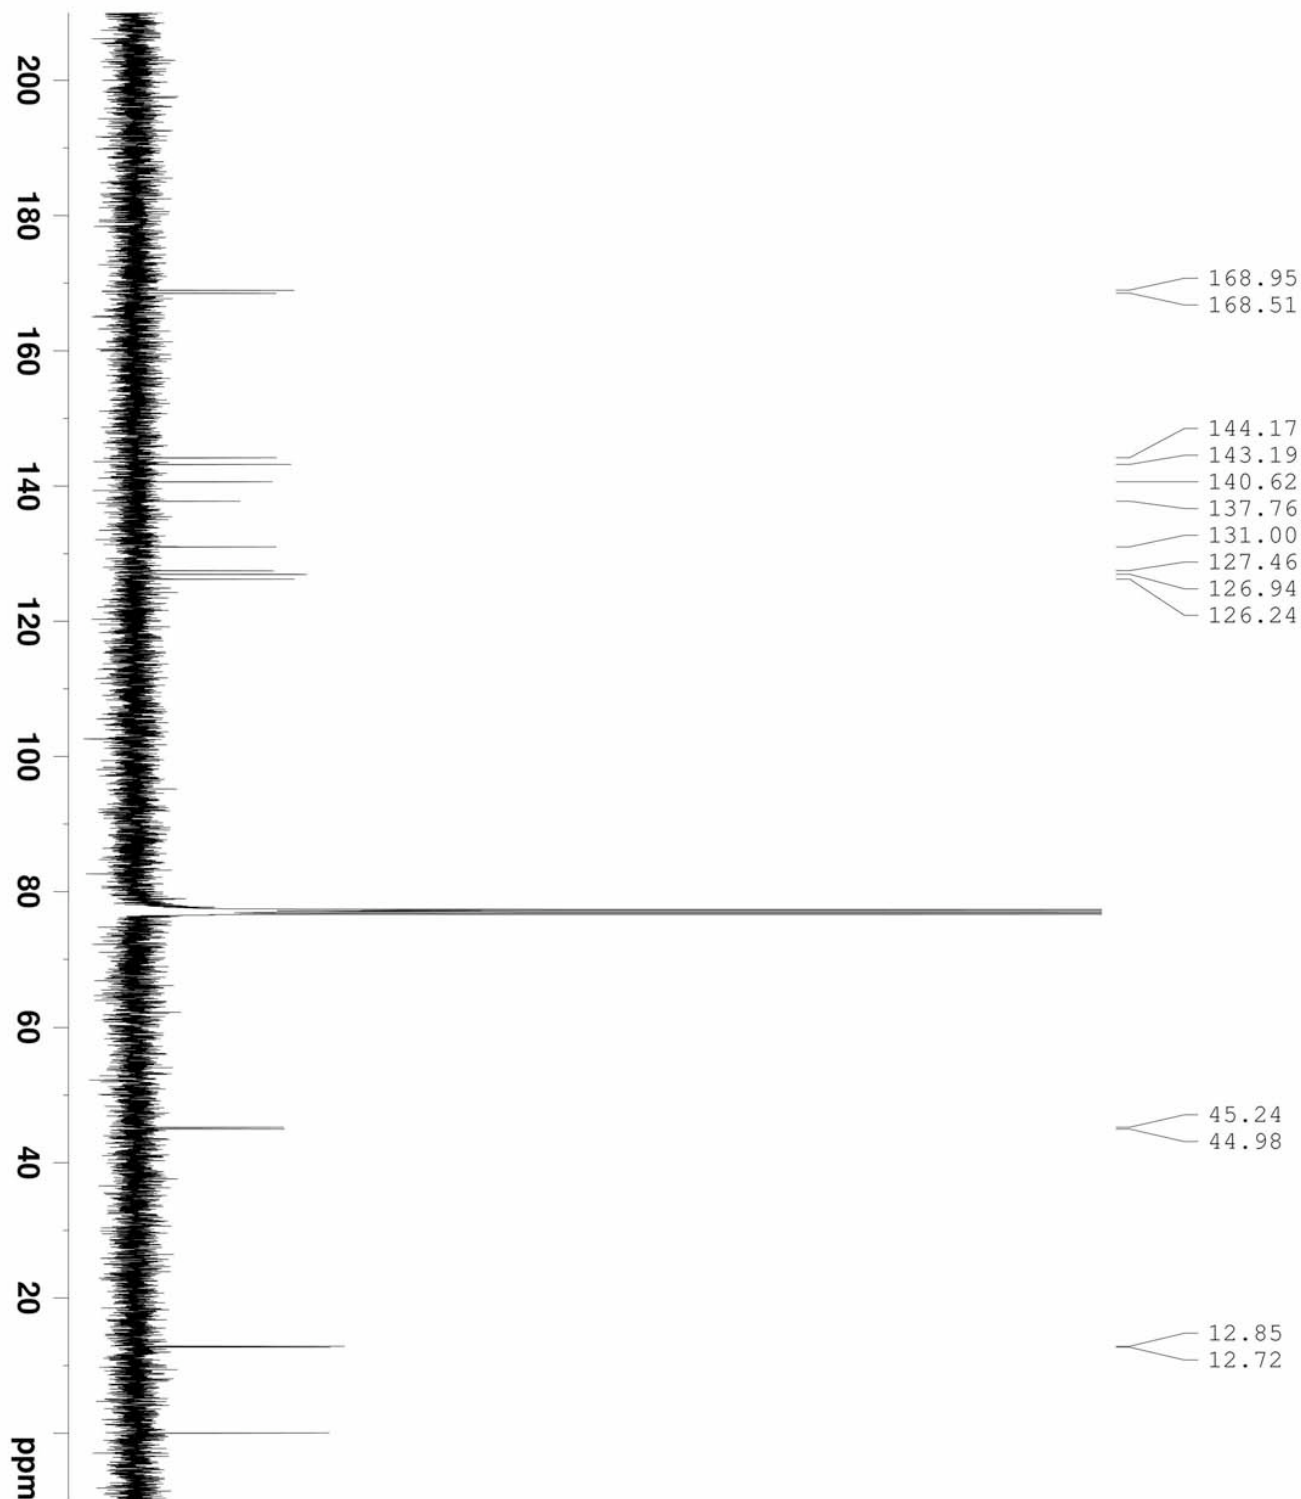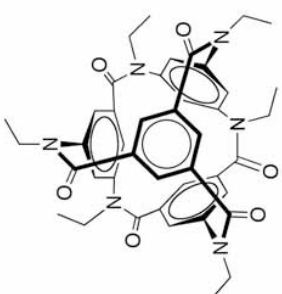

1 (racemic)

## Mass Spectra of Compounds

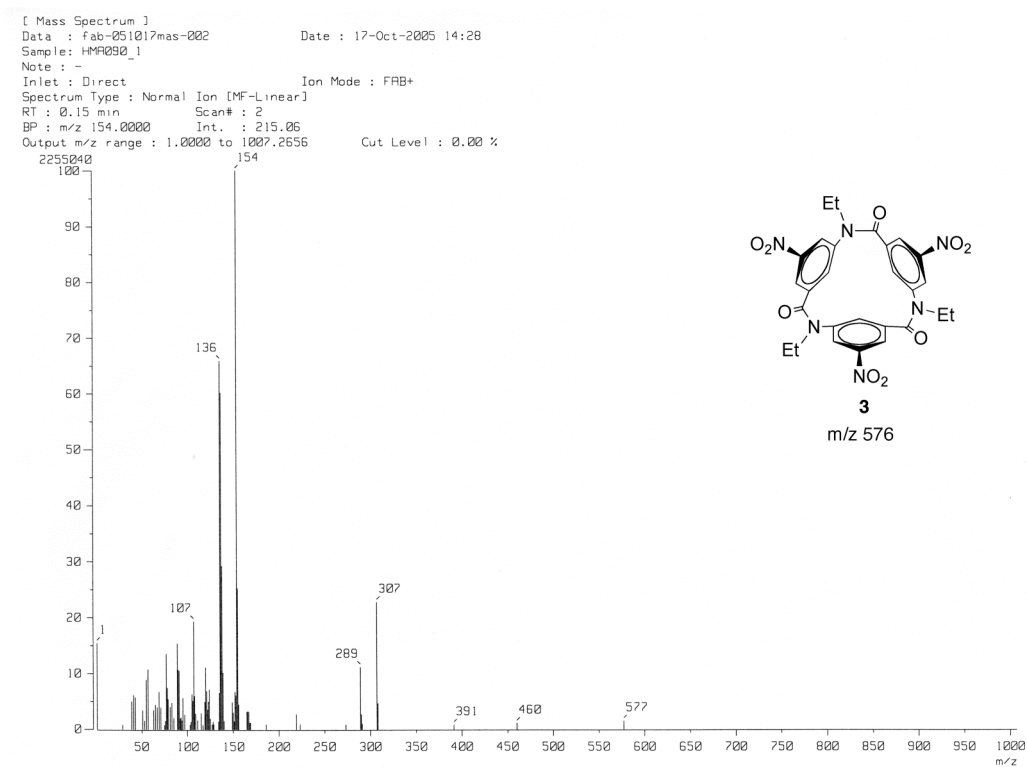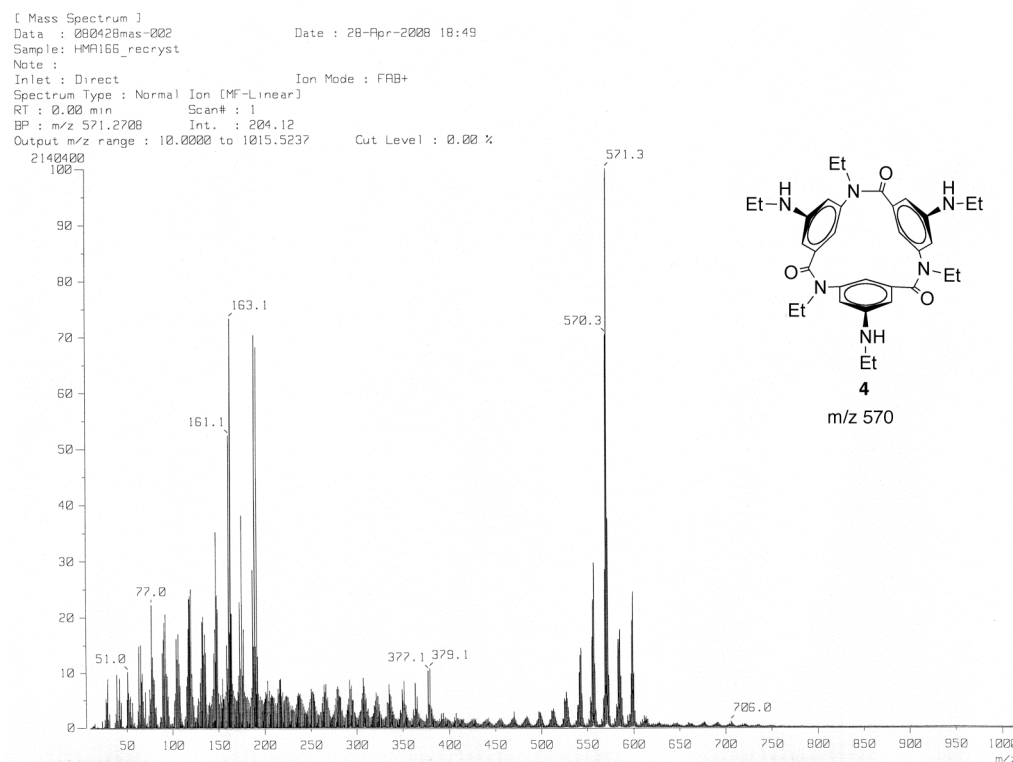

[ Mass Spectrum ]  
 Date : 060227-mas-001 Date : 27-Feb-2006 18:47  
 Sample: HMR162-1  
 Note : -  
 Inlet : Direct Ion Mode : FAB+  
 Spectrum Type : Normal Ion [MF-Linear]  
 RT : 0.00 min Scan# : 1  
 BP : m/z 154.0787 Int. : 771.72  
 Output m/z range : 10.0000 to 1025.6677 Cut Level : 0.00 %

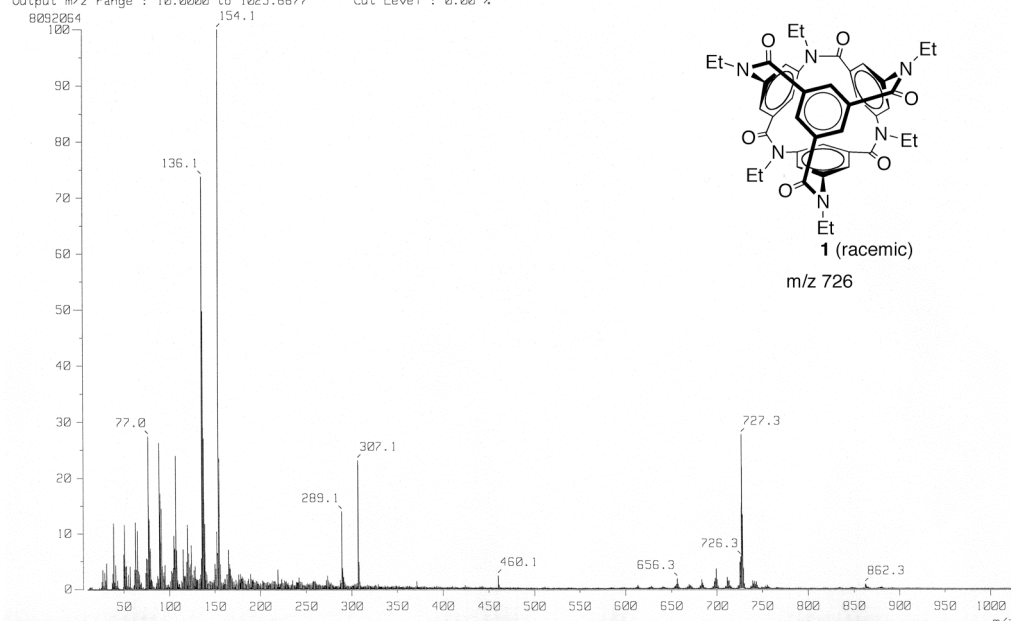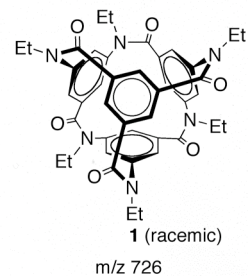

Supplement: Supplementary file 1 [file 4628281]
